# Supplementary material
Source: PubMed Central journal article supplement (PMC4394806)
Supplement: AAC.05055-14_zac005153942so1.pdf [file AAC.05055-14_zac005153942so1.pdf]

**(A)**

```

. 10 . 20 . 30 . 40 . 50
MRVLVVEDNALLRHHHLKVQLQELGHQVDAEADAREADYYLGEHLPDIAIV
helix H HHHHHHHHHHHHHHHHHHHHH HHHHHHHHHHHHHHH HHH
sheet EEE EEE EEE
turns T TT
coil CC CC

. 60 . 70 . 80 . 90 . 100
DLGLPDEDGLSLIRRWRSRDVSLPVLVLTAREGWQDKVEVLSAGADDYVT
helix HHHHH H HHH HHH HHHHHHH
sheet EE E E EEEEEEE EEE EE
turns T TTTTTT T T
coil CCC C

. 110 . 120 . 130 . 140 . 150
KPFHIEEVAARMQALLRRNSGLASQVISLPPFQVDLSRRELSVNDQPIKL
helix HHHHHHHHHHHH
sheet EE EEEEE EEEE EEE
turns TT TT TTTTTT
coil CCC CCC CC C CCC

. 160 . 170 . 180 . 190 . 200
TAFEYTIMETLIRNRGKVVSKDSLMLQLYPDAELRESHTIYVLMGRLRKK
helix HHHHHHHHHHHH HHH HHHHHHHHHHHHHHHHHHH
sheet E EEEE EEEE
turns TTTT
coil CC C

. 210 . 220
IQAEYPQDVITTVRGQGYLFELR
helix H
sheet EEE EEEEE EEEE
turns TTT TTT
coil C C CC

```

**(B)**

```

. 10 . 20 . 30 . 40 . 50
MRVLVVEDNALLRHHHLKVQLQELGHQVDAEADAREADYYLGEHLPDIAIV
helix H HHHHHHHHHHHHHHHHHHHHH HHHHHHHHHHHHHHH HHH
sheet EEE EEE EEE
turns T TT
coil CC CC

. 60 . 70 . 80 . 90 . 100
DLGLPDEDGLSLIRRWRSRDVSLPVLVLTAREGWQDKVEVLSAGADDYVT
helix HHHHH H HHH HHH HHHHHHH
sheet EE E E EEEEEEE EEE EE
turns T TTTTTT T T
coil CCC C

. 110 . 120 . 130 . 140 . 150
KPFHIEEVAARMQALLRRNSGLASQVISLPPFQVDLSRRELSVNDQPIKL
helix HHHHHHHHHHHH
sheet EE EEEEE EEEE EEE
turns TT TT TTTTTT
coil CCC CCC CC C CCC

. 160 . 170 . 180 . 190 . 200
TAFEYTIMETLIRNRGKVVSKDSLMLQLYPDAELRESHTIYVLMGRLRKK
helix HHHHHHHHHHHH HHH HHHHHHHHHHHHHHHHHHH
sheet E EEEE EEEE EEE
turns TTTT
coil CC C

. 210 . 220
IQAEYPQDVITTVRGQGYLFELR
helix H
sheet EEE EEEEE EEEE
turns TTT TTT
coil C C CC

```

Figure S1
